# Supplementary material for: Design and Content Validation using Expert Opinions of an Instrument Assessing the Lifestyle of Adults: The ‘PONTE A 100’ Questionnaire
Source: MDPI journal article supplement (doi:10.3390/healthcare11142038), 2023-07-16
Supplement: s1 [file s1]

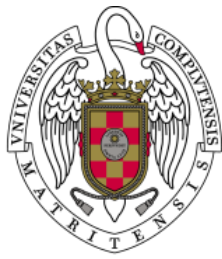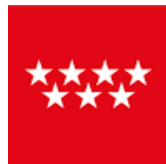

Comunidad  
de Madrid

CONSEJERÍA DE SANIDAD

## The '*PONTE A 100*' healthy lifestyle questionnaire

Healthy lifestyles are those that include habits, behaviours and daily customs that help people remain in adequate physical and mental condition throughout their lifetime. They improve personal wellbeing, help people stay healthy, improve one's capacities, and reduce pain.

# DO YOU HAVE A HEALTHY LIFESTYLE?

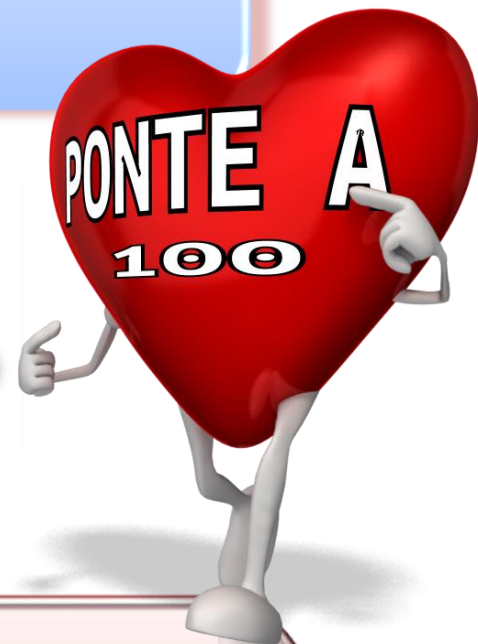

- ✓ **Complete** the following questionnaire to know if you have a healthy lifestyle.
- ✓ The questionnaire's **33 questions are grouped into five sections**: 'Food Habits', 'Physical Activity', 'Smoking and use of Alcohol, and other Drugs', 'Emotional Wellbeing' and 'Safety and Non-intentional Injuries'.
- ✓ **Think each question over and assign yourself points** following the option that best describes your situation over the last **3 months**. There are no right or wrong answers.
- ✓ **Work out your score for each section, as well as your final score** (maximum 100 points).

# 1.- FOOD HABITS

## Questions

## Answers

LIV  
POINTS

|                                                                                     |                                                                                                                                                                                                                                                                                                                                                                                                                                                                                                                                                                                             |                                                                                                                                                                      |  |
|-------------------------------------------------------------------------------------|---------------------------------------------------------------------------------------------------------------------------------------------------------------------------------------------------------------------------------------------------------------------------------------------------------------------------------------------------------------------------------------------------------------------------------------------------------------------------------------------------------------------------------------------------------------------------------------------|----------------------------------------------------------------------------------------------------------------------------------------------------------------------|--|
|    | <b>1. How many servings of vegetables and greens (excluding potatoes) do you eat per day (1 serving* is 150-200g)</b><br>* E.g., a large plate of mixed salad, cooked vegetables, vegetable purée or gazpacho, 1 large tomato or 2 carrots. A side dish would be 1/2 a serving.                                                                                                                                                                                                                                                                                                             | More than 1 = 2 points<br>1 = 1 point<br>None = 0 points                                                                                                             |  |
|    | <b>2. How many servings of fruit do you eat per day? (1 serving* is 150-200g)</b><br>* E.g., 1 medium sized orange, apple or banana, 2 small plums, mandarins or apricots, or a bowl of cherries, strawberries, grapes, or a slice of melon, water melon or pineapple.                                                                                                                                                                                                                                                                                                                      | More than 2 = 2 points<br>1-2 pieces = 1 point<br>None = 0 points                                                                                                    |  |
|    | <b>3. How many of servings* of wholegrain cereals (bread, pasta, rice...) do you have per day?</b><br>*E.g., a serving of whole grain bread would weigh 40-0 g (say 2-3 slices); 1 serving of wholegrain rice would weigh some 60-80 g (3 tablespoons raw or half a plateful when cooked).                                                                                                                                                                                                                                                                                                  | More than 2 = 3 points<br>2 = 2 points<br>1 = 1 point<br>None = 0 points                                                                                             |  |
|    | <b>4. Do you consume at least 3 soup spoonfuls (30 ml) of oil per day (raw or fried)?</b>                                                                                                                                                                                                                                                                                                                                                                                                                                                                                                   | - Yes, of virgin or extra virgin olive = 2 points<br>- Yes, of regular olive oil = 1 point<br>- No, but I consume other types of oil, margarine or butter = 0 points |  |
|   | <b>5. How many servings* of nuts (hazelnuts, almonds, cashews, pistachios) do you have per week?</b><br>*1 serving: 1 handful de 20-30 g                                                                                                                                                                                                                                                                                                                                                                                                                                                    | Raw: 4 -7 servings/week = 2 points<br>Raw or toasted (1-3 servings) = 1 point<br>I don't eat those quantities or I eat them fried, salted or sweet = 0 points        |  |
|  | <b>6. How many servings* of pulses (chickpeas, lentils, beans etc.) do you consume per week?</b><br>*1 serving is about 60-80 g raw (1 handful or cupful), 150-200 g cooked (1 medium sized soup plate or 2-3 ladlefuls when served with a sauce)                                                                                                                                                                                                                                                                                                                                           | More than 2 = 2 points<br>1-2 = 1 point<br>None = 0 points                                                                                                           |  |
|  | <b>7. How many servings* of fish/seafood do you have per week?</b><br>*1 serving = 100-150 g (1 fillet or medium slice of fish, 3-4 pieces of seafood)                                                                                                                                                                                                                                                                                                                                                                                                                                      | More than 2 = 2 points<br>1-2 = 1 point<br>None = 0 points                                                                                                           |  |
|  | <b>8. How many servings of red meats* (beef, lamb, pork etc.) or processed meats** (hamburgers, sausages, salami-type sausage, chicken nuggets, etc.) do you have per week?</b><br>*1 serving is 100-150 g (a medium sized fillet)<br>**1 serving is 3-4 slices of salami-type sausage, 1 hamburger, or 3 meatballs                                                                                                                                                                                                                                                                         | Less than 3 = 3 points<br>3-4 = 1 point<br>More than 4 = 0 points                                                                                                    |  |
|  | <b>9. Do you eat any highly- or ultra-processed* foods during the week?</b><br>*Sweet or savoury snacks, sweets, commercial sliced bread, sponge cake, buns, cakes, biscuits, sugary/refined breakfast cereals, fish fingers, commercial sauces, pizza, milkshakes, ice cream, instant soups, bouillon cubes, and other precooked or ready cooked foods that contain too much salt, fat, sugar, refined oil, or preservatives and additives. Note that little-processed foods such as tinned fruits, picked vegetables or cooked pulses in jars, etc. are <b>not</b> included in this list. | Less than 3 = 3 points<br>3-4 = 1 point<br>More than 4 = 0 points                                                                                                    |  |
|  | <b>10. Do you drink sugary/sweetened drinks (including sodas, energy drinks, milkshakes, and bottled/boxed fruit juice every day, or nearly every day?</b>                                                                                                                                                                                                                                                                                                                                                                                                                                  | No = 2 points<br>Yes, sweetened drinks ('light', 'zero', 'sugar-free') = 1 point<br>Yes, sugary drinks = 0 points                                                    |  |
|  | <b>11. Do you drink water during the day or perhaps with your food?</b>                                                                                                                                                                                                                                                                                                                                                                                                                                                                                                                     | Yes, 4 or more glasses* = 2 points<br>Yes, fewer than 4 glasses* = 1 point.<br>No = 0 points<br>* 1 glass = 200 ml                                                   |  |

**Total score**  
**(Maximum 25 points)**

## 2. PHYSICAL ACTIVITY

| Questions                                                                                                                                                                                                                                                                                                                         | Answers                                                                                       | LIV<br>POINTS |
|-----------------------------------------------------------------------------------------------------------------------------------------------------------------------------------------------------------------------------------------------------------------------------------------------------------------------------------|-----------------------------------------------------------------------------------------------|---------------|
|  <p>1. How many times per week do you do at least 25 minutes of <b>intense physical activity</b>?</p>                                                                                                                                            | <p>3 or more = 12 points<br/>1-2 = 6 points<br/>Never = 0 points</p>                          | <p>1</p>      |
|  <p>2. How many times per week do you do at least 30 minutes of <b>moderate physical activity</b>?</p>                                                                                                                                           | <p>5 or more = 12 points<br/>3-4 = 6 points<br/>1-2 = 3 points<br/>Never = 0 points</p>       | <p>2</p>      |
|  <p>3. How many times per week do you do muscle strengthening exercise?*</p> <p><small>*using weights/dumbbells, exercise machines, resistance bands, or your own body weight (sit-ups on the floor or against a wall, squats, etc.)</small></p> | <p>2 or more = 4 points<br/>1 = 2 points<br/>Never = 0 points</p>                             | <p>3</p>      |
|  <p>4. When you are sat down or laying down during the day do you undertake sessions of active movement/stretching, etc., every <b>60-90 minutes</b>?</p>                                                                                      | <p>Always/nearly always: 4 points<br/>Sometimes: 2 points<br/>Never/hardly ever: 0 points</p> | <p>4</p>      |

The physical activity times mentioned above can be reached by adding smaller periods of activity (of at least 10 minutes) together.

**NOTE: QUESTIONS 1 AND 2 ARE COMPLEMENTARY, ALLOWING FOR COMBINATIONS OF DIFFERENT ACTIVITY TO BE CONTEMPLATED, BUT ALWAYS FOR A MAXIMUM OF 12 POINTS**

|                                        |   |                                   |   |                                   |   |                                                              |
|----------------------------------------|---|-----------------------------------|---|-----------------------------------|---|--------------------------------------------------------------|
| questions 1+ 2:<br>(maximum 12 points) | + | question 3:<br>(maximum 4 points) | + | question 4:<br>(maximum 4 points) | = | <b>PHYSICAL ACTIVITY<br/>SCORE</b><br>(Maximum 20<br>points) |
|----------------------------------------|---|-----------------------------------|---|-----------------------------------|---|--------------------------------------------------------------|

"Intensity" refers to the effort put into a physical activity.

The experience of intensity depends on how fit a person is. The following are just examples; the experience of intensity may not be the same for everyone.

**1.- INTENSE or VIGOROUS.** This requires much effort and provokes rapid breathing and a substantially increased heart rate, e.g., jogging, quickly ascending a slope, rapid cycling, aerobics, rapid swimming, and competitive sport such as football, volleyball, basketball, skating or squash.

**2.- MODERATE.** This requires an increase in breathing without running out of breath, and a perceptible increase in the heart rate, e.g., walking quickly (7000-8000 steps/day), dancing, active participation in sport with children, cycling, swimming for fun.

# 3. SMOKING AND USE OF ALCOHOL AND OTHER DRUGS

## 3.1. CONSUMPTION OF ALCOHOL

Nº units

1. How many **units** of alcoholic drinks do you consume per **week**?

### ALCOHOL UNITS IN DRINKS

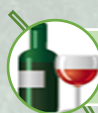

1 glass of red, white or sparkling wine (100 ml) = **1 unit**

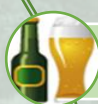

One small beer or glass of cider (200 ml) = **1 unit**

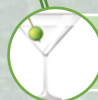

1 coffee with liqueur (25 ml) or 1 vermouth (50 ml) = **1 unit**

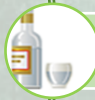

1 glass of anise liqueur, sloe gin, or similar (30 ml): **1 unit**

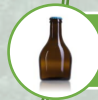

A bottle of beer (330 ml): **1.5 units**

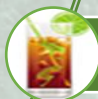

1 gin and tonic, rum and coke, etc., (50 ml): **2 units**

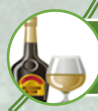

1 glass of whisky or brandy (50 ml): **2 units**

### Assessment of alcohol consumption:

| Women  | Men  | LIV POINTS |
|-------------------------------------------------------------------------------------------|-------------------------------------------------------------------------------------------|------------|
| NO ALCOHOL CONSUMPTION                                                                    |                                                                                           | 10         |
| Up to 7 units/week (*)                                                                    | Up to 14 units/week (*)                                                                   | 5          |
| 8-12 units/week                                                                           | 15-21 units/week                                                                          | 0          |
| Intensive or binge drinking:<br>4 units in one session of 3-4 h                           | intensive binge drinking:<br>6 <b>units</b> in one session of 3-4 h                       |            |
| 13-17 units/week                                                                          | 22-28 units/week                                                                          | - 5        |
| Over 17 units/week                                                                        | Over 28 units/week                                                                        | - 10       |

(\*) Always in non-intensive form (which would score 0 points)

**SCORE FOR ALCOHOL  
CONSUMPTION  
(Maximum 10 points)**

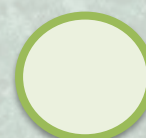



## 3.2. SMOKING AND OTHER TOBACCO USES

### Questions

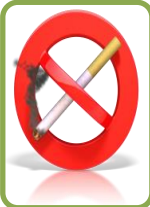

#### Do you currently smoke\*?

Answer YES if you do, whether habitually (daily) or occasionally.

\* Includes the use of cigarettes, cigars, pipes, e-cigarettes/vaping devices, hookahs, etc.

#### If you do:

- How many cigarettes/e-cigarettes or cigars or hookahs per day?

### Answers

LIV  
POINTS

NO: 15 POINTS

YES, occasionally = 0 points

YES, 1-10 cigarettes/day (or 1 hookah, or 1 cigar/day) = -5

Si, 11-20 cigarettes/day (or 2 hookahs or 2 cigar/day) = -10

Yes, over 20 cigarettes/day (or ≥ 3 hookahs or 3 cigar/day) = -15 points

## 3.3. CONSUMPTION OF OTHER DRUGS

### Questions

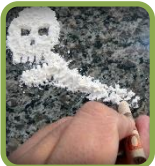

#### 1. Do you use any kind of drug\*?

\*Cannabis/marijuana/hash, cocaine, heroin, ecstasy, synthetic drugs, others...

### Answers

LIV  
POINTS

- No = 0 points

- Yes, occasionally = -5 points

- Yes, daily = -10

**TOTAL SCORE FOR ALL  
THESE HABITS  
(Maximum 25 points)**

## 4. EMOTIONAL WELLBEING

### Questions

### Answers

LIV  
POINTS

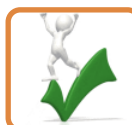

1. I am happy with who I am  
(at peace with myself)

Always or nearly always: 2 points  
Sometimes: 1 point  
Never or hardly ever: 0 points

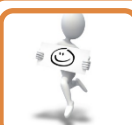

2. I am happy with my life

Always or nearly always: 2 points  
Sometimes: 1 point  
Never or hardly ever: 0 points

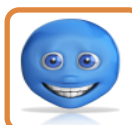

3. I am happy and in good  
humour

Always or nearly always: 2 points  
Sometimes: 1 point  
Never or hardly ever: 0 points

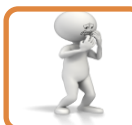

4. I feel stressed, worried or  
irritable

Always or nearly always: 0 points  
Sometimes: 1 point  
Never or hardly ever: 2 points

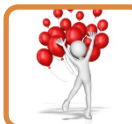

5. I feel motivated to do new  
activities  
(leisure/work/sporting)

Always or nearly always: 2 points  
Sometimes: 1 point  
Never or hardly ever: 0 points

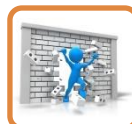

6. I feel I can overcome  
problems

Always or nearly always: 2 points  
Sometimes: 1 point  
Never or hardly ever: 0 points

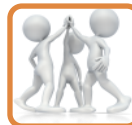

7. I have people with whom I have a  
good relationship and with whom I  
can share my worries

Always or nearly always: 2 points  
Sometimes: 1 point  
Never or hardly ever: 0 points

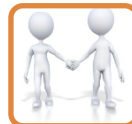

8. I feel loved by those who  
are important to me

Always or nearly always: 2 points  
Sometimes: 1 point  
Never or hardly ever: 0 points

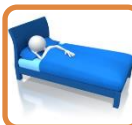

9. I sleep and get up  
refreshed

Always or nearly always: 2 points  
Sometimes: 1 point  
Never or hardly ever: 0 points

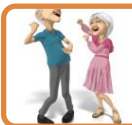

10. I have enough leisure  
time

Always or nearly always: 2 points  
Sometimes: 1 point  
Never or hardly ever: 0 points

**SCORE FOR EMOTIONAL  
WELLBEING**  
(Maximum 20 points)

## 5. SAFETY AND NON-INTENTIONAL INJURIES

### Questions

### Answers

LIV  
POINTS

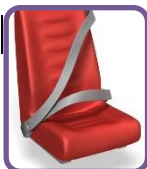

1. Do you wear a seatbelt in a car and/or a helmet when on a motorbike (or when cycling or skating/skate boarding [when indicated]), whether you are driving or a passenger?

YES: 2 points  
Sometimes: 1 point  
NO: 0 points

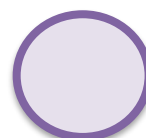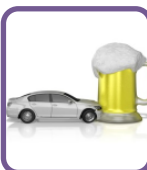

2. Do you follow the recommendation not to drive under the influence of alcohol or drugs, and decline to be driven by those who are?

YES: 2 points  
Sometimes: 1 point  
NO: 0 points

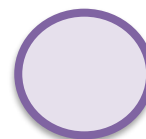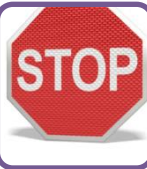

3. Do you follow road regulations, as a driver e.g., keeping to speed limits, not driving and using your telephone in any way, and when a pedestrian do you, e.g., cross roads where it is safe and appropriate?

YES: 2 points  
Sometimes: 1 point  
NO: 0 points

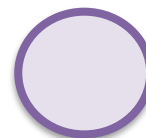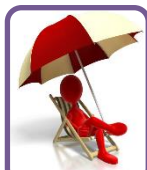

4. Do you follow indications relating to swimming in the sea, in rivers, lakes and swimming pools etc.? E.g., Do you swim where there are lifeguards and obey red flag warnings, avoid swimming at night/after drinking, dive only in inappropriate places

YES: 2 points  
Sometimes: 1 point  
NO: 0 points

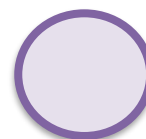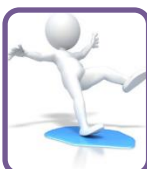

5. Do you follow basic recommendations to prevent domestic accidents (e.g., have regular gas inspections, ventilate rooms to remove heater fumes etc., handle dangerous substances (such as cleaning products) with care, find ways to prevent falls [especially for the elderly], by using anti-slip patches in the shower or bathtub, by removing mats and ensuring good lighting)

YES: 2 points  
Sometimes: 1 point  
NO: 0 points

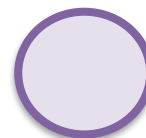

**SCORE FOR SAFETY AND  
NON-INTENTIONAL  
LESIONS  
(Maximum 10 points)**

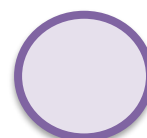

# THE 'PONTE A 100' HEALTHY LIFESTYLE QUESTIONNAIRE

## TOTAL LIV POINTS

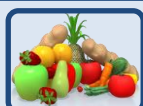

**FOOD HABITS**

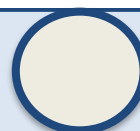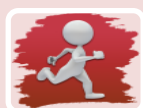

**PHYSICAL ACTIVITY**

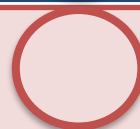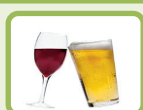

**SMOKING AND USE OF ALCOHOL  
OTHER DRUGS**

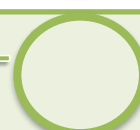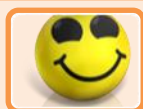

**EMOTIONAL WELLBEING**

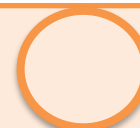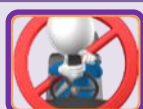

**SAFETY AND NON-INTENTIONAL  
INJURIES**

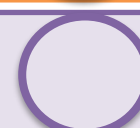

**YOUR LIFESTYLE INDEX VALUE**

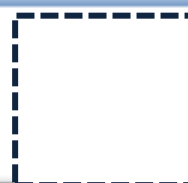

- ✓ The **AIM** is to score the **MAXIMUM 100 LIV points**.  
The higher your Lifestyle Index Value, the more healthy your lifestyle is.
- ✓ **PLAN CHANGES** for the items that scored below-maximum LIV points.
- ✓ **YOU CAN CHANGE YOUR LIFESTYLE AND MAKE IT MORE HEALTHY!**

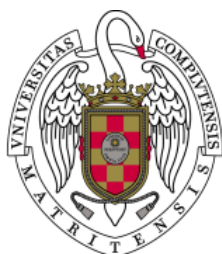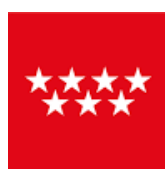

**Comunidad  
de Madrid**

CONSEJERÍA DE SANIDAD
