# Supplementary material for: Design and Content Validation using Expert Opinions of an Instrument Assessing the Lifestyle of Adults: The ‘PONTE A 100’ Questionnaire
Source: MDPI journal article supplement (doi:10.3390/healthcare11142038), 2023-07-16
Supplement: s1 [file s1]

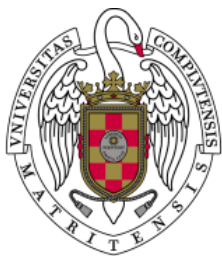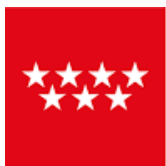

Comunidad  
de Madrid

CONSEJERÍA DE SANIDAD

## CUESTIONARIO DE ESTILO DE VIDA SALUDABLE: "PONTE A 100"

Los **estilos de vida saludable** hacen referencia a un conjunto de comportamientos, hábitos y costumbres cotidianas que llevan a cabo las personas para mantener, de manera adecuada, su cuerpo y su mente a lo largo de todo el ciclo vital. Contribuyen a mejorar el bienestar personal y la calidad de vida, a mantenerse sano y a disminuir la discapacidad y el dolor.

### ¿TIENE USTED UN ESTILO DE VIDA SALUDABLE?

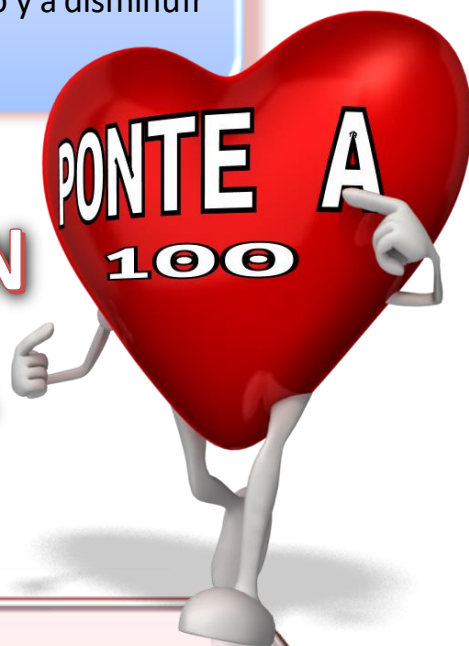

- ✓ **Cumplimente** el siguiente cuestionario y conozca si su estilo de vida es saludable.
- ✓ Consta de **33 preguntas agrupadas en cinco apartados**: 'Alimentación', 'Actividad física y sedentarismo', 'Hábitos tóxicos (consumo de alcohol, tabaco y otras drogas)', 'Bienestar emocional' y 'Seguridad y Lesiones no intencionales'.
- ✓ **Valore** cada una de las **preguntas y asigne los puntos** de la opción que más se adapte a su situación personal en los **últimos 3 meses**. No hay respuestas correctas e incorrectas.
- ✓ Obtenga la puntuación para cada uno de los **apartados y la puntuación final** sumando la obtenida para cada uno de los apartados con un máximo de **100 puntos**.

# 1.- ALIMENTACION

## PREGUNTAS DE VALORACIÓN

## RESPUESTAS

PUNTOS

|                                                                                     |                                                                                                                                                                                                                                                                                                                                                                                                                                                                                                                                                                                                                       |                                                                                                                                                                                                         |  |
|-------------------------------------------------------------------------------------|-----------------------------------------------------------------------------------------------------------------------------------------------------------------------------------------------------------------------------------------------------------------------------------------------------------------------------------------------------------------------------------------------------------------------------------------------------------------------------------------------------------------------------------------------------------------------------------------------------------------------|---------------------------------------------------------------------------------------------------------------------------------------------------------------------------------------------------------|--|
|    | <b>1. ¿Cuántas raciones de verduras u hortalizas (no se incluyen patatas) consume al día? (1 ración*: 150-200g)</b><br>* Plato grande de ensalada variada, de verdura cocida, de puré de verduras o de gazpacho/salmorejo; 1 tomate grande; 2 zanahorias. Guarnición=1/2 ración.                                                                                                                                                                                                                                                                                                                                      | Más de 1 = 2 puntos<br>1 ración = 1 punto<br>Ninguna = 0 puntos                                                                                                                                         |  |
|    | <b>2. ¿Cuántas raciones de fruta consume al día? (1 ración*: 150-200 g)</b><br>* 1 pieza mediana (naranja/manzana/plátano...), 2 piezas pequeñas (ciruelas/mandarinas/albaricoques...), 1 taza/bol de cerezas/fresas/ufas, 1 raja/rodaja de sandía/melón/piña                                                                                                                                                                                                                                                                                                                                                         | Más de 2 = 2 puntos<br>1-2 piezas = 1 punto<br>Ninguna = 0 puntos                                                                                                                                       |  |
|    | <b>3.- ¿Cuántas raciones* de cereales integrales (pan, pasta, arroz...) consume al día?</b><br>* 1 ración de pan integral:40-60 g (2-3 rebanadas);<br>1 ración de arroz/ pasta integral:60-80 g (3 cucharadas en crudo o 1 plato mediano cocinado)                                                                                                                                                                                                                                                                                                                                                                    | Más de 2 = 3 puntos<br>2 = 2 puntos<br>1 = 1 punto<br>Ninguna = 0 puntos                                                                                                                                |  |
|    | <b>4. ¿Consume al menos 3 cucharadas soperas (30 ml) de aceite al día (crudo, frito...)?</b>                                                                                                                                                                                                                                                                                                                                                                                                                                                                                                                          | - Si, de Aceite de Oliva Virgen (o virgen extra) = 2 puntos<br>- Si, de aceite de Oliva = 1 punto<br>- No consume esa cantidad de aceite o consume otro tipo de aceite/margarina/mantequilla = 0 puntos |  |
|   | <b>5. ¿Cuántas raciones* de frutos secos (nueces, avellanas, almendras, anacardos, pistachos) consume a la semana?</b><br>* 1 ración: 1 puñado de 20-30 g                                                                                                                                                                                                                                                                                                                                                                                                                                                             | Crudos (al natural): De 4 a 7 raciones/semana = 2 puntos<br>Crudos o Tostados (1-3 raciones) = 1 punto<br>No consumo esas cantidades o los consumo fritos, salados o dulces = 0 puntos                  |  |
|  | <b>6. ¿Cuántas raciones* de legumbres (garbanzos, lentejas, alubias...) consume a la semana?</b><br>* 1 ración: 60-80 g crudo (1 puñado/taza), 150-200 g cocido (1 plato hondo mediano o 2-3 cazos de servir con caldo)                                                                                                                                                                                                                                                                                                                                                                                               | Más de 2 = 2 puntos<br>1 - 2 = 1 punto<br>Ninguna = 0 puntos                                                                                                                                            |  |
|  | <b>7. ¿Cuántas raciones* de pescado/marisco consume a la semana?</b><br>* 1 ración=100-150g (1 filete/rodaja mediana, 3-4 piezas de marisco)                                                                                                                                                                                                                                                                                                                                                                                                                                                                          | Más de 2 = 2 puntos<br>1 - 2 = 1 punto<br>Ninguna = 0 puntos                                                                                                                                            |  |
|  | <b>8. ¿Cuántas raciones de carnes rojas* (vacuno, cordero, cerdo...) o carnes procesadas** (hamburguesas, salchichas, embutidos, nuggets de pollo...) consume a la semana?</b><br>* 1 ración=100-150g: filete mediano<br>** 1 ración: 3-4 lonchas de embutido; 1 hamburguesa; 3 albóndigas.                                                                                                                                                                                                                                                                                                                           | Menos de 3 = 3 puntos<br>3 - 4 = 1 punto<br>Más de 4 = 0 puntos                                                                                                                                         |  |
|  | <b>9. ¿Consume algún producto altamente procesado o ultraprocesado(*) a la semana?</b><br>(*) Snacks dulces y salados, chucherías, pan envasado, pan de molde, bizcochos, bollos, pasteles, galletas, cereales de desayuno refinados/azucarados, palitos de pescado, salsas comerciales, pizza, batidos, helados, sopas 'instantáneas', pastillas de caldo... y otros alimentos precocinados/listos para consumir con exceso de sal, azúcar, aceites refinados o conservantes/ aditivos. (Se excluyen alimentos poco procesados como las frutas y verduras envasadas, los encurtidos o las legumbres cocidas en bote) | Menos de 3 = 3 puntos<br>3 - 4 = 1 punto<br>Mas de 4 = 0 puntos                                                                                                                                         |  |
|  | <b>10. ¿Consume alguna bebida azucarada/edulcorada (refrescos, bebidas energéticas, batidos, zumos envasados...) a diario/casi a diario?</b>                                                                                                                                                                                                                                                                                                                                                                                                                                                                          | No = 2 puntos<br>Si, bebidas edulcoradas ('light', 'zero', 'sin azúcar') = 1 punto<br>Sí, bebidas azucaradas= 0 puntos                                                                                  |  |
|  | <b>11. ¿Bebe agua a lo largo del día y/o con las comidas?</b>                                                                                                                                                                                                                                                                                                                                                                                                                                                                                                                                                         | Sí, 4 o más vasos* = 2 puntos<br>Sí, menos de 4 vasos* = 1 punto.<br>No= 0 puntos<br>* 1 vaso= 200ml                                                                                                    |  |

**PUNTUACIÓN TOTAL  
ALIMENTACIÓN  
(Máximo 25 puntos)**

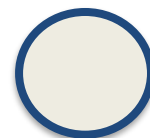

## 2.- ACTIVIDAD FÍSICA Y SEDENTARISMO

| PREGUNTAS DE VALORACIÓN                                                                                                                                                                                                                                                                                                                                               | RESPUESTAS                                                                                           | PUNTOS   |
|-----------------------------------------------------------------------------------------------------------------------------------------------------------------------------------------------------------------------------------------------------------------------------------------------------------------------------------------------------------------------|------------------------------------------------------------------------------------------------------|----------|
|  <p>1. ¿Cuántas veces por semana realiza usted, al menos, 25 minutos de <b>actividad física INTENSA</b>?</p>                                                                                                                                                                         | <p>3 o más = 12 puntos<br/>1-2 = 6 puntos<br/>Nunca = 0 puntos</p>                                   | <p>1</p> |
|  <p>2. ¿Cuántas veces por semana realiza usted, al menos, 30 minutos de <b>actividad física MODERADA</b>?</p>                                                                                                                                                                        | <p>5 o más = 12 puntos<br/>3-4 = 6 puntos<br/>1-2 = 3 puntos<br/>Nunca = 0 puntos</p>                | <p>2</p> |
|  <p>3. ¿Cuántas veces por semana realiza <b>ejercicios de fortalecimiento muscular*</b>?</p> <p>* Pesas/Mancuernas, máquinas de pesas, bandas de resistencia o actividades con el propio peso corporal, (flexiones en el suelo o contra la pared, sentadillas, abdominales, ...)</p> | <p>2 o más = 4 puntos<br/>1 = 2 puntos<br/>Nunca = 0 puntos</p>                                      | <p>3</p> |
|  <p>4. A lo largo del día, durante el tiempo que se encuentra sentado/a, reclinado/a o tumbado/a, ¿realiza <b>descansos activos cada 60-90 minutos</b> dando un breve paseo o con sesiones cortas de estiramientos?</p>                                                            | <p>Siempre o casi siempre: 4 puntos<br/>Algunas veces: 2 puntos<br/>Nunca o Casi Nunca: 0 puntos</p> | <p>4</p> |

Los tiempos de actividad física también se pueden alcanzar sumando periodos más cortos de actividad, a partir de 10 minutos.

**NOTA: LAS PREGUNTAS 1 Y 2 SON COMPLEMENTARIAS, PERMITIENDO DIFERENTES COMBINACIONES DE ACTIVIDAD, PERO SIEMPRE POR UN MÁXIMO DE 12 PUNTOS.**

|                                        |   |                                    |   |                                    |   |                                                                     |
|----------------------------------------|---|------------------------------------|---|------------------------------------|---|---------------------------------------------------------------------|
| Puntuación 1+ 2:<br>(Máximo 12 puntos) | + | Puntuación 3:<br>(Máximo 4 puntos) | + | Puntuación 4:<br>(Máximo 4 puntos) | = | <b>PUNTUACIÓN TOTAL<br/>ACTIVIDAD FÍSICA<br/>(Máximo 20 puntos)</b> |
|----------------------------------------|---|------------------------------------|---|------------------------------------|---|---------------------------------------------------------------------|

La **intensidad** es el esfuerzo que tenemos que hacer para llevar a cabo una actividad física

La intensidad de diferentes formas de actividad física varía de una persona a otra y depende de lo ejercitado que esté cada uno y de su forma física. Por ello, los ejemplos que se exponen a continuación son orientativos y pueden variar de una persona a otra

**1.- INTENSA o VIGOROSA (Requiere una gran cantidad de esfuerzo y provoca una respiración rápida y un aumento sustancial de la frecuencia cardíaca):** footing, ascender a paso rápido o trepar por una ladera, desplazamientos rápidos en bicicleta, aeróbic, natación rápida, deportes y juegos competitivos (fútbol, voleibol, hockey, baloncesto, patinaje, squash...)

**2.- MODERADA (Requiere un esfuerzo moderado, que acelera de forma perceptible el ritmo cardiaco y el respiratorio, pero aún se puede hablar sin sentir que falta el aire):** caminar a paso rápido (7000-8000 pasos/día), bailar, participación activa en juegos y deportes con niños, pasear en bicicleta, nadar por placer...



### 3.- CONSUMO DE ALCOHOL, TABACO Y OTRAS DROGAS

#### 3.1.- CONSUMO DE ALCOHOL

Nº unidades

1.- Habitualmente, ¿cuántas **unidades** de bebida alcohólica suele consumir en una **semana**?

#### UNIDADES ALCOHÓLICAS DE CADA BEBIDA

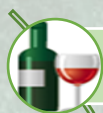

1 copa de vino tinto, blanco o cava (100 ml): **1** unidad

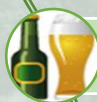

1 caña de cerveza o 1 vaso de sidra (200 ml): **1** unidad

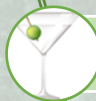

1 carajillo (25 ml) o 1 vermut (50 ml): **1** unidad

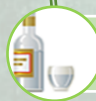

1 chupito de anís, pacharán, licor (30 ml): **1** unidad

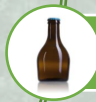

1 tercio de cerveza (330 ml): **1,5** unidades

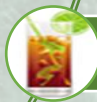

1 combinado de gin tonic, ron cola... (50 ml): **2** unidades

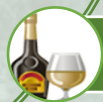

1 copa de whisky o coñac (50 ml): **2** unidades

#### VALORACIÓN DEL CONSUMO DE ALCOHOL:

| Mujeres ♀                                                                  | Hombres ♂                                                                  | PUNTOS |
|----------------------------------------------------------------------------|----------------------------------------------------------------------------|--------|
| NINGÚN CONSUMO DE ALCOHOL (CONSUMO CERO)                                   |                                                                            | 10     |
| Consumo de hasta 7 unidades/semana (*)                                     | Consumo de hasta 14 unidades/semana (*)                                    | 5      |
| Consumo entre 8 y 12 unidades/semana                                       | Consumo entre 15 y 21 unidades/semana                                      | 0      |
| Consumo intensivo o 'binge drinking':<br>4 unidades en una sesión de 3-4 h | Consumo intensivo o 'binge drinking':<br>6 unidades en una sesión de 3-4 h |        |
| Consumo entre 13 y 17 unidades/semana                                      | Consumo entre 22 y 28 unidades/semana                                      | - 5    |
| Consumo superior a 17 unidades/semana                                      | Consumo superior a 28 unidades/semana                                      | - 10   |

(\*) Siempre que este consumo no se realice en forma de consumo intensivo, en cuyo caso la puntuación sería 0

**PUNTUACIÓN TOTAL  
CONSUMO DE ALCOHOL  
(Máximo 10 puntos)**

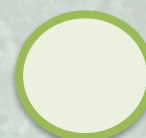

## 3.2.- CONSUMO DE TABACO

### PREGUNTAS DE VALORACIÓN

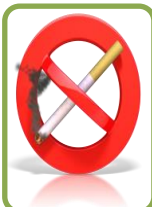

#### 1.- ¿Fuma en la actualidad?:

Responda SI en el caso de que fume (\*) en la actualidad, bien de forma habitual (diariamente) o de forma ocasional.

\* Cigarros, puros, pipas, sistemas electrónicos de administración de nicotina/cigarrillos electrónicos/vapeadores, pipas de agua/cachimba/shisha/narguiles, ...

#### En caso de fumadores, señalar:

- Nº de cigarrillos/cigarrillos electrónicos o cachimbas o puros/día:

### RESPUESTAS

PUNTOS

NO: 15 PUNTOS

SI, ocasionalmente = 0 puntos

Sí, 1-10 cig/día (o 1 cachimba o 1 puro/día) = -5

Si, 11-20 cig/día (o 2 cachimbas o 2 puros/día) = -10

Sí, más de 20 cig/día (o ≥ 3 cachimbas o 3 puros/día) = -15 puntos

## 3.3.- CONSUMO DE OTRAS DROGAS

### PREGUNTAS DE VALORACIÓN

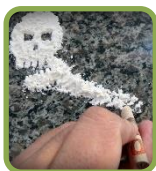

#### 1.-¿Consume algún otro tipo de droga\*?.

\* Cannabis/marihuana/hachís, cocaína, heroína, éxtasis, drogas de síntesis, otro tipo de drogas...

### RESPUESTAS

PUNTOS

- No = 0 puntos

- Sí, ocasionalmente = -5 puntos

- Sí, a diario = -10

**PUNTUACIÓN TOTAL  
HÁBITOS TÓXICOS  
(Máximo 25 puntos)**

## 4.- BIENESTAR EMOCIONAL

### PREGUNTAS DE VALORACIÓN

### RESPUESTAS

### PUNTOS

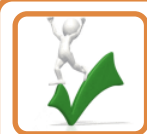

1.- Me siento satisfecho/a de quién/como soy (estoy a gusto conmigo mismo/a)

Siempre o casi siempre: 2 puntos  
Algunas veces: 1 punto  
Nunca o Casi Nunca: 0 puntos

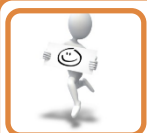

2.- Estoy contento/a con la vida que llevo

Siempre o casi siempre: 2 puntos  
Algunas veces: 1 punto  
Nunca o Casi Nunca: 0 puntos

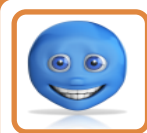

3.- Estoy alegre y de buen humor

Siempre o casi siempre: 2 puntos  
Algunas veces: 1 punto  
Nunca o Casi Nunca: 0 puntos

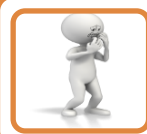

4.- Me siento estresado/a, nervioso/a, angustiado/a, irritable...

Siempre o casi siempre: 0 puntos  
Algunas veces: 1 punto  
Nunca o Casi Nunca: 2 puntos

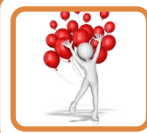

5.- Me siento motivado/a a la hora de realizar nuevas actividades (ocio/ laborales/deportivas)

Siempre o casi siempre: 2 puntos  
Algunas veces: 1 punto  
Nunca o Casi Nunca: 0 puntos

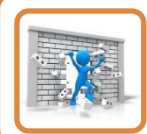

6.- Me siento capaz de superar las dificultades que se me presentan

Siempre o casi siempre: 2 puntos  
Algunas veces: 1 punto  
Nunca o Casi Nunca: 0 puntos

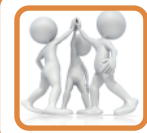

7.- Tengo personas en mi entorno con las que me relaciono satisfactoriamente

Siempre o casi siempre: 2 puntos  
Algunas veces: 1 punto  
Nunca o Casi Nunca: 0 puntos

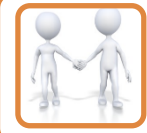

8.- Me siento querido/a por las personas importantes para mi

Siempre o casi siempre: 2 puntos  
Algunas veces: 1 punto  
Nunca o Casi Nunca: 0 puntos

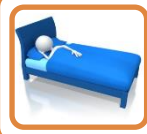

9.- Duermo bien, me levanto descansado/a.

Siempre o casi siempre: 2 puntos  
Algunas veces: 1 punto  
Nunca o Casi Nunca: 0 puntos

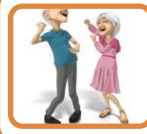

10.- Tengo suficiente tiempo de ocio.

Siempre o casi siempre: 2 puntos  
Algunas veces: 1 punto  
Nunca o Casi Nunca: 0 puntos

**PUNTUACIÓN TOTAL  
BIENESTAR EMOCIONAL  
(Máximo 20 puntos)**



## 5.- SEGURIDAD Y LESIONES NO INTENCIONALES

### PREGUNTAS DE VALORACIÓN

### RESPUESTAS

### PUNTOS

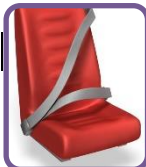

1.- Llevo el cinturón de seguridad cuando viajo en coche y/o el casco si voy en moto (o en bicicleta, patines o patinete, cuando esté indicado), tanto como conductor como acompañante.

SI: 2 puntos  
A veces: 1 punto  
NO: 0 puntos

☐
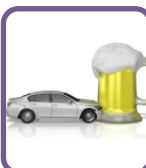

2.- Sigo las recomendaciones de no conducir bajo la influencia del alcohol u otras drogas, ni viajo con alguien que conduzca bajo su influencia.

SI: 2 puntos  
A veces: 1 punto  
NO: 0 puntos

☐
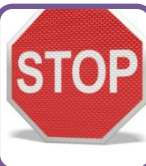

3.- Respeto las normas de tráfico como conductor/a y/o peatón/a: límites de velocidad, cruzar por sitios autorizados, evitar distracciones con el teléfono móvil (enviar WhatsApp®/redes sociales/llamadas)...

SI: 2 puntos  
A veces: 1 punto  
NO: 0 puntos

☐
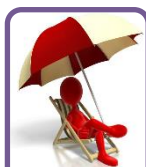

4. Respeto las normas de seguridad(\*) relacionadas con el baño en playas, ríos, pantanos, embalses y piscinas.  
(\*) Bañarse en playas con vigilancia; no bañarse si esta la bandera roja, si es de noche o se ha consumido alcohol; no tirarse de cabeza en zonas desconocidas o en las que está prohibido; utilizar protección solar

SI: 2 puntos  
A veces: 1 punto  
NO: 0 puntos

☐
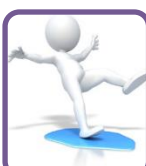

5.- Sigo las recomendaciones básicas (\*) para evitar los accidentes en el hogar  
(\*) Revisión periódica de instalaciones de gas, ventilar a diario salas con estufas o braseros, manejo con prudencia de sustancias peligrosas como los productos de limpieza, prevención de caídas en personas mayores (instalación de tiras antideslizantes en duchas y bañeras, evitar alfombras, buena iluminación...)

SI: 2 puntos  
A veces: 1 punto  
NO: 0 puntos

☐

**PUNTUACIÓN TOTAL  
SEGURIDAD Y LESIONES  
NO INTENCIONALES  
(Máximo 10 puntos)**

☐

CUESTIONARIO DE ESTILO DE VIDA  
SALUDABLE EN ATENCIÓN PRIMARIA:  
“PONTE A 100”

PUNTUACIÓN TOTAL

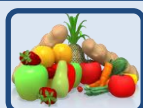

ALIMENTACION

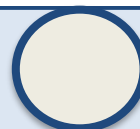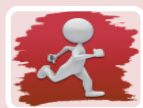

ACTIVIDAD FÍSICA

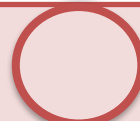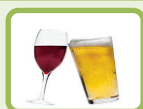

CONSUMO DE ALCOHOL,  
TABACO Y OTRAS DROGAS

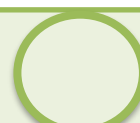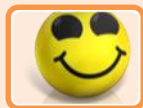

BIENESTAR EMOCIONAL

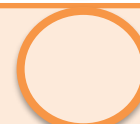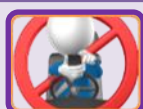

SEGURIDAD Y LESIONES NO  
INTENCIONALES

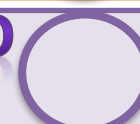

PUNTUACIÓN TOTAL (ISEV\*)

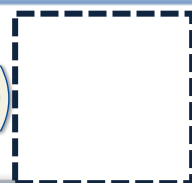

- ✓ El **OBJETIVO** es **ALCANZAR LA MAXIMA PUNTUACIÓN** (100 puntos).  
Cuanto mayores es la puntuación, más saludable se considera su estilo de vida.
- ✓ **REVISE** los **APARTADOS** donde haya alcanzado **MENOR PUNTUACIÓN** y planifique por dónde quiere empezar a cambiar.
- ✓ Siempre es **POSIBLE CAMBIAR EL ESTILO DE VIDA** para hacerlo más **SALUDABLE**.

\* ISEV: ÍNDICE SINTÉTICO DE ESTILOS DE VIDA

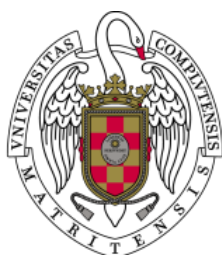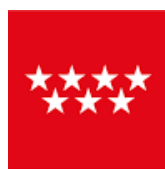

Comunidad  
de Madrid

CONSEJERÍA DE SANIDAD
